# Supplementary material for: A role for triglyceride lipase brummer in the regulation of sex differences in Drosophila fat storage and breakdown
Source: PLoS Biol. 2020 Jan 21;18(1):e3000595. doi: 10.1371/journal.pbio.3000595 (PMC6994176; doi:10.1371/journal.pbio.3000595)
Supplement: S3 Table — GFP, green fluorescent protein. (XLSX) [file pbio.3000595.s027.xlsx]

## Sheet: Sheet1
Female							Male							Legend
	brain	gut	head FB	ab FB	gonad			brain	gut	head FB	ab FB	gonad		-	not detected
+ > nGFP	-	-	-	-	-		+ > nGFP	-	-	-	-	-		+	very low expression
elav > nGFP	+++	-	-	-	+		elav > nGFP	+++	-	-	-	-		++	low expression
nSyb > nGFP	++++	-	-	-	-		nSyb > nGFP	++++	-	-	-	-		+++	strong expression
cg > nGFP	-	-	-	++++	+		cg > nGFP	-	-	-	+++	+		++++	very strong expression
r4 > nGFP	-	+	-	++++	-		r4 > nGFP	-	-	-	++++	+
c587 > nGFP	+	-	-	-	++++		c587 > nGFP	+	-	-	-	++++
tj > nGFP	+	-	-	-	++++		tj > nGFP	++	-	-	-	++++
